# Supplementary material for: Inheritance of Fruit Red-Flesh Patterns in Peach
Source: MDPI journal article supplement (doi:10.3390/plants12020394), 2023-01-14
Supplement: s1 [file s1]

| Plant name      | Flesh color (FC) | Red dots in the flesh (RDF) | Red dots under the skin (RDS) | Red color around the stone (Cs) | MD 2019 |
|-----------------|------------------|-----------------------------|-------------------------------|---------------------------------|---------|
| ALABAMA         | W                | no                          | si                            | no                              | 196     |
| ALBATINE        | W                | si                          | no                            | no                              | 176     |
| ALCATRAZ        | W                | no                          | no                            | no                              | 171     |
| ALMAMIEL        | Y                | no                          | no                            | si                              | 220     |
| ALMANEBO        | Y                | no                          | no                            | no                              | 169     |
| ALMANOR         | Y                | si                          | no                            | no                              | 213     |
| ALMONTIEL       | Y                | no                          | no                            | no                              | 189     |
| AMADEUS         | W                | no                          | si                            | no                              | 182     |
| AMBRA           | Y                | si                          | no                            | no                              | 182     |
| ARGOS           | Y                | no                          | no                            | no                              | 171     |
| ARIZONA         | Y                | si                          | no                            | no                              | 192     |
| ARTEMIS         | Y                | si                          | no                            | no                              | 164     |
| ASF 10-36       | W                | no                          | no                            | si                              | 267     |
| ASF 10-53       | W                | no                          | no                            | si                              | 267     |
| ASTORIA         | Y                | si                          | no                            | no                              | 154     |
| AUTUMN FLAME 38 | Y                | no                          | no                            | si                              | 267     |
| BEAUTY PEARL    | W                | no                          | si                            | no                              | 189     |
| BIG TOP         | Y                | si                          | no                            | no                              | 182     |
| BOREAL          | W                | no                          | no                            | no                              | 169     |
| BORNEO          | Y                | no                          | no                            | no                              | 171     |
| BRITNEY LANE    | Y                | si                          | si                            | no                              | 171     |
| BUENOS          | Y                | no                          | no                            | no                              | 185     |
| BUENOS II       | Y                | no                          | no                            | no                              | 185     |
| BURMA           | W                | si                          | no                            | si                              | 224     |
| CAKEREVE        | W                | si                          | no                            | no                              | 189     |
| CANDY PEARL     | W                | no                          | no                            | no                              | 189     |
| CARACAS         | Y                | si                          | no                            | no                              | 189     |
| CARAMBA         | W                | no                          | no                            | no                              | 196     |
| CARLA           | Y                | si                          | no                            | no                              | 161     |
| CATHERINA       | Y                | no                          | no                            | no                              | 196     |
| CLARISS         | Y                | si                          | no                            | no                              | 210     |
| CONTESSA        | W                | no                          | no                            | no                              | 169     |
| CRISPDIVA       | Y                | no                          | no                            | si                              | 252     |
| CRISPDREAM      | Y                | si                          | no                            | no                              | 217     |
| CRISPGOUDE      | Y                | si                          | no                            | no                              | 213     |
| CRISPSOL        | Y                | si                          | no                            | no                              | 245     |
| CRISPSREVE      | Y                | si                          | no                            | no                              | 203     |
| CRISPTOLAM      | Y                | si                          | no                            | no                              | 169     |
| DIABLOTINA      | R                | -                           | -                             | -                               | 224     |
| DIAMOND PEARL   | W                | si                          | no                            | no                              | 176     |
| E45.004         | W                | no                          | no                            | no                              | 171     |
| ELEGANT LADY    | Y                | no                          | no                            | si                              | 224     |
| EMERAUDE        | W                | si                          | si                            | no                              | 196     |
| ESMERALDA       | Y                | no                          | no                            | si                              | 252     |
| EXTREME 618     | Y                | no                          | no                            | si                              | 259     |
| FEBE            | Y                | no                          | no                            | si                              | 239     |
| FERCLUSE        | Y                | no                          | no                            | no                              | 217     |
| FERLATE         | Y                | no                          | no                            | no                              | 252     |
| FERLOT          | Y                | no                          | no                            | no                              | 232     |
| FILOE           | W                | si                          | no                            | no                              | 224     |
| FLATBUZZ        | W                | si                          | no                            | no                              | 182     |
| FLATCANDY       | W                | si                          | si                            | no                              | 182     |
| FLATCHIEF       | W                | no                          | si                            | no                              | 199     |
| FLATDIVA        | W                | no                          | no                            | si                              | 255     |

| Plant name   | Flesh color (FC) | Red dots in the flesh (RDF) | Red dots under the skin (RDS) | Red color around the stone (Cs) | MD 2019 |
|--------------|------------------|-----------------------------|-------------------------------|---------------------------------|---------|
| FLATELSE     | W                | si                          | si                            | no                              | 206     |
| FLATSTAR     | W                | no                          | no                            | si                              | 239     |
| FLATWO       | W                | si                          | no                            | no                              | 164     |
| GARCICA      | W                | si                          | no                            | no                              | 189     |
| GARDETA      | Y                | si                          | no                            | no                              | 182     |
| GEA          | Y                | no                          | no                            | no                              | 203     |
| GLADYS       | W                | no                          | no                            | si                              | 259     |
| GRAND CANDY  | W                | no                          | no                            | no                              | 185     |
| GUAYOX 4-24  | W                | si                          | no                            | no                              | 224     |
| GUAYOX36     | W                | si                          | no                            | no                              | 245     |
| IBIZA        | W                | no                          | no                            | no                              | 213     |
| ICE PEACH    | W                | no                          | no                            | no                              | 239     |
| IVORY NIGHT  | W                | no                          | no                            | si                              | 252     |
| IVORY STAR   | W                | si                          | no                            | no                              | 199     |
| IVORY SUN    | W                | no                          | no                            | si                              | 252     |
| KINOLEA      | Y                | si                          | no                            | no                              | 239     |
| LAMBADA      | Y                | si                          | no                            | no                              | 210     |
| LEA          | W                | si                          | no                            | no                              | 176     |
| LEONIDA      | W                | si                          | no                            | no                              | 161     |
| LUCIANA      | Y                | si                          | no                            | no                              | 213     |
| LUCIUS       | W                | no                          | no                            | si                              | 252     |
| MAREVA       | W                | si                          | no                            | no                              | 171     |
| MELISSA      | W                | si                          | no                            | no                              | 220     |
| MELOX26      | W                | si                          | no                            | no                              | 179     |
| MELOX31      | W                | no                          | no                            | no                              | 226     |
| MELOX34      | W                | si                          | no                            | si                              | 239     |
| MELOX37      | W                | no                          | no                            | si                              | 259     |
| MISTRAL30    | Y                | no                          | no                            | no                              | 185     |
| MOMBASSA     | Y                | no                          | si                            | no                              | 189     |
| MONANGE      | W                | si                          | no                            | no                              | 189     |
| MONATUM      | W                | no                          | no                            | no                              | 157     |
| MONIFIC      | Y                | si                          | si                            | no                              | 171     |
| MONMEIL      | W                | no                          | no                            | no                              | 199     |
| MONSOLE      | W                | si                          | no                            | no                              | 171     |
| MONTICA      | Y                | no                          | no                            | no                              | 203     |
| NABEPI       | W                | si                          | no                            | no                              | 179     |
| NABIDELICE   | W                | no                          | si                            | no                              | 192     |
| NAJATAR      | Y                | no                          | no                            | si                              | 245     |
| NAJICAN      | Y                | si                          | no                            | no                              | 217     |
| NB895        | W                | no                          | no                            | si                              | 259     |
| NECTABINGO   | Y                | si                          | no                            | no                              | 185     |
| NECTADIVA    | Y                | no                          | no                            | si                              | 255     |
| NECTAFLASH   | Y                | no                          | no                            | no                              | 169     |
| NECTAKING    | Y                | no                          | si                            | no                              | 203     |
| NECTANA      | Y                | no                          | no                            | si                              | 245     |
| NECTAPERF    | W                | no                          | no                            | si                              | 245     |
| NECTARANGELS | W                | no                          | no                            | no                              | 206     |
| NECTARELSE   | W                | no                          | no                            | si                              | 267     |
| NECTARNOVALA | W                | no                          | no                            | no                              | 179     |
| NECTARNOW    | W                | si                          | no                            | no                              | 203     |
| NECTARONDA   | Y                | si                          | no                            | no                              | 192     |
| NECTATINTO   | Y                | no                          | no                            | si                              | 259     |
| NETIX 31     | Y                | si                          | no                            | no                              | 217     |
| NETIX22-57   | Y                | no                          | no                            | si                              | 239     |

| Plant name      | Flesh color (FC) | Red dots in the flesh (RDF) | Red dots under the skin (RDS) | Red color around the stone (Cs) | MD 2019 |
|-----------------|------------------|-----------------------------|-------------------------------|---------------------------------|---------|
| NETIX25         | Y                | no                          | no                            | no                              | 171     |
| NETIX28         | Y                | no                          | si                            | no                              | 199     |
| NETIX30         | Y                | si                          | no                            | si                              | 213     |
| NIRVANA         | W                | si                          | no                            | no                              | 199     |
| NORACILA        | Y                | no                          | no                            | no                              | 171     |
| O'HENRY         | Y                | si                          | no                            | si                              | 245     |
| OPERA           | W                | no                          | no                            | si                              | 224     |
| ORENGA          | W                | si                          | si                            | no                              | 196     |
| OSIRIS          | Y                | no                          | no                            | no                              | 164     |
| OSIRIS          | Y                | no                          | no                            | no                              | 164     |
| PABEARLY        | W                | no                          | no                            | no                              | 164     |
| PAJATO          | Y                | no                          | no                            | no                              | 157     |
| PAMELA          | W                | si                          | no                            | no                              | 164     |
| PAMPANA         | Y                | si                          | no                            | no                              | 164     |
| PATTY           | W                | no                          | si                            | no                              | 182     |
| PLAGOLD 19S     | Y                | no                          | si                            | no                              | 182     |
| PLATIMED        | W                | no                          | no                            | no                              | 185     |
| PRINCE PEARL    | W                | no                          | no                            | no                              | 161     |
| REDIX120        | W                | si                          | si                            | no                              | 199     |
| REDIX24         | W                | si                          | no                            | no                              | 164     |
| REDIX30         | W                | si                          | no                            | no                              | 210     |
| RMC 3-11-1-7-4  | Y                | si                          | no                            | no                              | 182     |
| ROMEA           | Y                | no                          | no                            | no                              | 185     |
| ROYAL SUMMER    | Y                | no                          | no                            | no                              | 199     |
| SAMANTHA        | W                | si                          | no                            | no                              | 164     |
| SMOOTY          | Y                | no                          | no                            | no                              | 164     |
| SNOW FLAKE      | W                | no                          | no                            | no                              | 164     |
| SNOW FLAME 19   | W                | no                          | no                            | no                              | 154     |
| SNOW FLAME 23   | W                | no                          | no                            | no                              | 164     |
| SNOW FLAME 36   | W                | no                          | no                            | si                              | 259     |
| SNOW FLAME 38   | W                | no                          | no                            | si                              | 267     |
| SNOW LADY       | W                | si                          | si                            | no                              | 232     |
| SPRING FLAME 20 | Y                | no                          | no                            | no                              | 161     |
| SUGAR TIME      | Y                | no                          | no                            | no                              | 164     |
| SUMMER FLAME 34 | Y                | no                          | no                            | si                              | 232     |
| SUMMER FLARE 36 | Y                | no                          | no                            | si                              | 259     |
| SUN BRIGHT      | Y                | si                          | no                            | si                              | 239     |
| SWEET HENRY     | Y                | no                          | no                            | si                              | 252     |
| SWEET REGAL     | W                | no                          | si                            | no                              | 210     |
| SWEETALY        | W                | no                          | no                            | no                              | 169     |
| SWEETBANG       | W                | si                          | si                            | no                              | 182     |
| SWEETCAP        | W                | si                          | no                            | no                              | 220     |
| SWEETDREAM      | Y                | si                          | no                            | no                              | 224     |
| TANGOS II       | W                | no                          | no                            | no                              | 199     |
| TIETAR          | Y                | no                          | no                            | no                              | 267     |
| TIFANY          | W                | si                          | no                            | no                              | 213     |
| TOP PEARL       | W                | no                          | no                            | no                              | 189     |
| VENUS           | Y                | si                          | no                            | no                              | 224     |
| YELLOW STONE    | Y                | no                          | no                            | no                              | 179     |
| ZINCAL 18S      | Y                | si                          | no                            | no                              | 182     |
| ZINCAL 25S      | Y                | no                          | si                            | no                              | 185     |
